# Supplementary material for: Noble gas isotope analysis (He to Xe) with an iterative trapping method on a split flight tube mass spectrometer
Source: Royal Society of Chemistry journal article supplement (doi:10.1039/d2ja00153e), 2022-01-01
Supplement: d2ja00153e1.pdf [file d2ja00153e1.pdf]

## Supplementary Information

### Text S1

The following tests show that the pole pieces stay magnetised even after 2 hours, the  $^3\text{He}$ - $^4\text{He}$  coincidence scans hold. A mass jump test to Argon and back to Helium at the end also show obvious change in coincidence scans. This confirms that magnetising the pole pieces before any helium mass calibration is done will allow the long term run of helium alone as well as He-Ne analysis in the same sample run. This is true providing the system is kept at a higher mass (Ne or Ar) when it is idle and the user jumps to a higher mass once in a while to keep the pole pieces magnetised.

1. In the beginning, conduct He mass calibration and  $^3\text{He}$ - $^4\text{He}$  coincidence scan with HD.

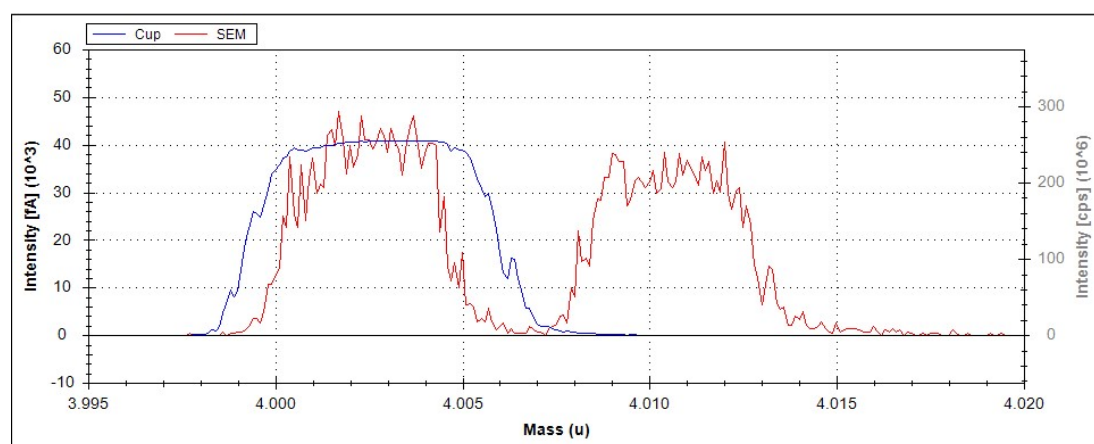

2. Switched to Ne configuration for 5 minutes.

3. **Time = 0 min:** Switched back to He configuration,  $^3\text{He}$ - $^4\text{He}$  coincidence scan. He peaks significantly shift to smaller mass.

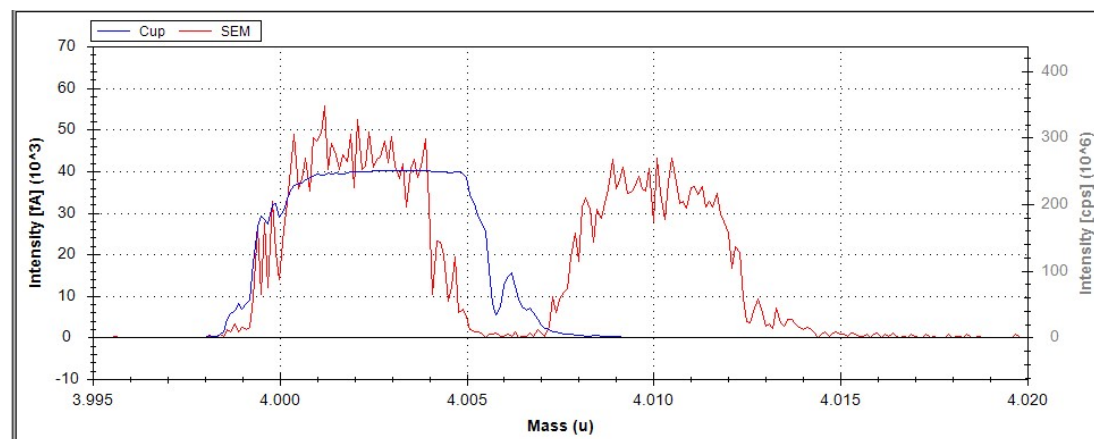

4. **Time = 165 min:** Switched to Ne configuration.
5. **Time = 185 min:** New air aliquot is injected into the SFT. Switched to He configuration
6. **Time = 190 min:**  $^3\text{He}$ - $^4\text{He}$  coincidence scan.

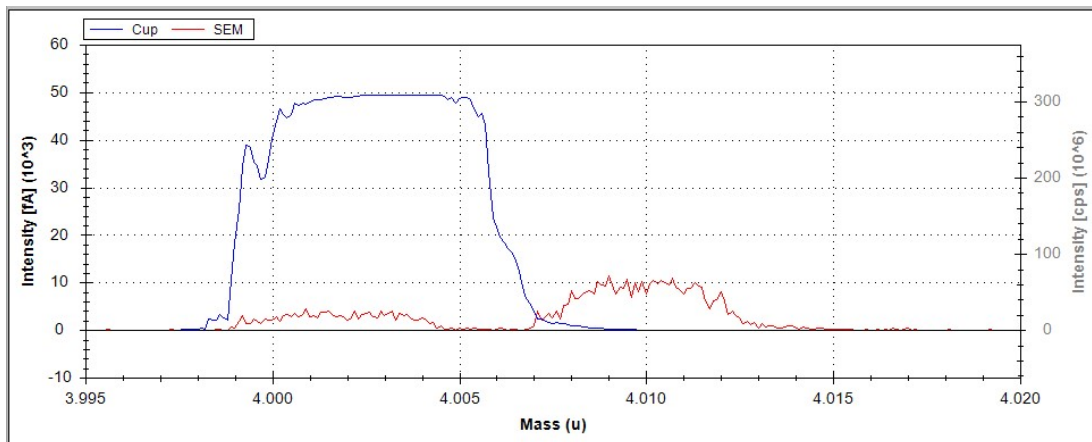

7. **Time = 195 min:** Switched to Ar configuration
8. **Time = 210 min:** Switched back to He configuration.  $^3\text{He}$ - $^4\text{He}$  coincidence scan. A prominent peak position return happened after switched to Ar configuration.

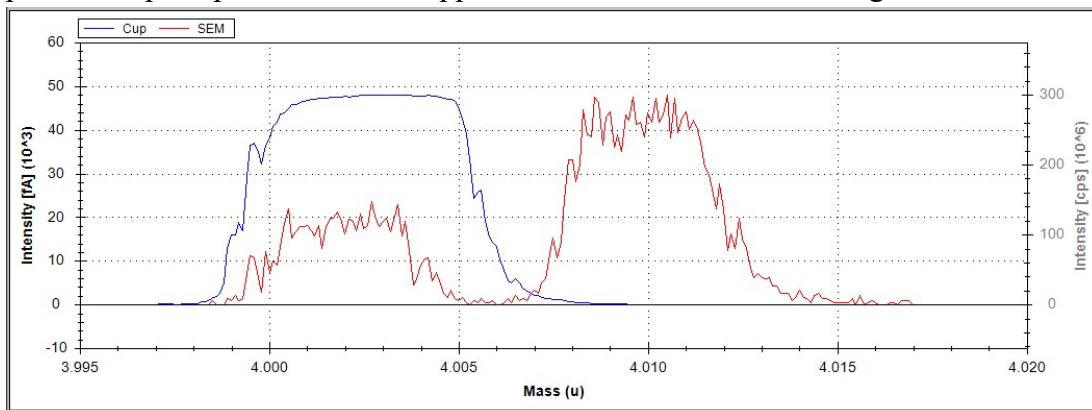

Table S1. He-Ne and Kr-Xe releasing profile with temperature of the modified ARS cryostat

| Temperature<br>(K) | <sup>4</sup> He | <sup>20</sup> Ne | Temperature<br>(K) | <sup>84</sup> Kr | <sup>132</sup> Xe |
|--------------------|-----------------|------------------|--------------------|------------------|-------------------|
|                    | (% Released)    |                  |                    | (% Released)     |                   |
| 10                 | 0.00            | 0.00             | 100                | 0.01             | 0.01              |
| 12                 | 0.13            | 0.00             | 105                | 0.01             | 0.01              |
| 14                 | 4.52            | 0.00             | 110                | 0.04             | 0.01              |
| 16                 | 40.88           | 0.00             | 115                | 0.39             | 0.01              |
| 18                 | 82.09           | 0.00             | 120                | 1.92             | 0.01              |
| 20                 | 93.89           | 0.00             | 125                | 4.34             | 0.01              |
| 22                 | 98.21           | 0.01             | 130                | 6.80             | 0.01              |
| 24                 | 99.96           | 0.02             | 140                | 13.82            | 0.01              |
| 26                 | 100.00          | 0.05             | 150                | 23.05            | 0.34              |
| 28                 | 99.67           | 0.15             | 160                | 37.53            | 0.34              |
| 30                 | 98.47           | 0.87             | 170                | 52.80            | 0.84              |
| 35                 |                 | 26.82            | 180                | 69.64            | 0.84              |
| 40                 |                 | 83.78            | 190                | 86.19            | 1.13              |
| 42                 |                 | 93.32            | 195                | 91.78            | 1.43              |
| 44                 |                 | 97.05            | 200                | 94.83            | 1.92              |
| 46                 |                 | 98.61            | 205                | 97.72            | 2.52              |
| 48                 |                 | 99.42            | 210                | 100.00           | 3.94              |
| 50                 |                 | 99.72            | 212                | 99.96            | 5.07              |
| 55                 |                 | 100.00           | 214                |                  | 6.16              |
| 58                 |                 | 99.79            | 216                |                  | 7.53              |
| 60                 |                 | 99.23            | 218                |                  | 9.78              |
|                    |                 |                  | 220                |                  | 12.09             |
|                    |                 |                  | 230                |                  | 20.37             |
|                    |                 |                  | 240                |                  | 34.41             |
|                    |                 |                  | 250                |                  | 56.97             |
|                    |                 |                  | 260                |                  | 82.44             |
|                    |                 |                  | 265                |                  | 95.17             |
|                    |                 |                  | 270                |                  | 100.00            |
|                    |                 |                  | 272                |                  | 99.31             |

Table S2.  $^{20}\text{Ne}$  and  $^{40}\text{Ar}$  signal intensity released together with Kr at Kr releasing temperature of the ARS cryostat.

| Analysis Number | $^{20}\text{Ne}$ released with Kr (fA) | $^{40}\text{Ar}$ released with Kr (fA) |
|-----------------|----------------------------------------|----------------------------------------|
| 1               | 1371.30                                | 3941.00                                |
| 2               | 3583.00                                | 11052.00                               |
| 3               | 1627.00                                | 4590.00                                |
| 4               | 3222.00                                | 10412.00                               |
| 5               | 3187.00                                | 9576.00                                |
| 6               | 3167.00                                | 9395.00                                |
| 7               | 2446.00                                | 9144.00                                |
| 8               | 3493.00                                | 11313.00                               |
| 9               | 3199.00                                | 9945.00                                |
| 10              | 1375.00                                | 5678.00                                |
| 11              | 1216.57                                | 4029.00                                |
| 12              | 2119.45                                | 8210.00                                |
| 13              | 2264.13                                | 8549.32                                |
| 14              | 2169.80                                | 6044.00                                |
| 15              | 2561.00                                | 6984.00                                |

Table S3. Noble gas sensitivities from measurements on the Helix SFT mass spectrometer.

| Analysis No. | Sensitivity (A/Torr) |          |          |          |          |
|--------------|----------------------|----------|----------|----------|----------|
|              | He                   | Ne       | Ar       | Kr       | Xe       |
| 1            | 1.80E-04             | 9.00E-05 | 2.59E-04 | 4.74E-04 | 1.02E-03 |
| 2            | 1.73E-04             | 8.18E-05 | 2.31E-04 | 4.53E-04 | 1.02E-03 |
| 3            | 1.77E-04             | 1.07E-04 | 2.44E-04 | 5.07E-04 | 1.03E-03 |
| 4            | 1.67E-04             | 1.10E-04 | 2.26E-04 | 5.25E-04 | 1.00E-03 |
| 5            | 1.71E-04             | 1.11E-04 | 2.37E-04 | 5.13E-04 | 9.72E-04 |
| 6            | 1.67E-04             | 9.77E-05 | 2.31E-04 | 4.92E-04 | 1.02E-03 |
| 7            | 1.79E-04             | 1.01E-04 | 2.31E-04 | 4.76E-04 | 9.74E-04 |
| 8            | 1.78E-04             | 1.00E-04 | 2.28E-04 | 5.35E-04 | 9.81E-04 |
| 9            | 1.82E-04             | 1.07E-04 | 2.18E-04 | 5.21E-04 | 1.01E-03 |
| 10           | 1.72E-04             | 1.02E-04 | 2.34E-04 | 4.97E-04 | 1.07E-03 |
| 11           | 1.79E-04             | 1.05E-04 | 2.26E-04 | 5.10E-04 | 1.05E-03 |
| 12           | 1.75E-04             | 1.05E-04 | 2.28E-04 | 5.37E-04 | 1.05E-03 |
| 13           | 1.79E-04             | 9.04E-05 | 2.08E-04 | 4.90E-04 | 1.04E-03 |
| 14           | 1.70E-04             | 9.17E-05 | 2.08E-04 | 5.25E-04 | 1.06E-03 |
| 15           | 1.60E-04             | 8.55E-05 | 2.42E-04 | 5.55E-04 | 1.01E-03 |
| 16           | 1.61E-04             | 8.99E-05 | 2.16E-04 | 5.10E-04 | 9.95E-04 |
| 17           | 1.60E-04             | 9.37E-05 | 2.26E-04 | 5.33E-04 | 9.78E-04 |
| 18           | 1.81E-04             | 1.00E-04 | 2.19E-04 | 5.00E-04 | 9.97E-04 |
| 19           | 1.73E-04             | 9.66E-05 | 2.27E-04 | 5.15E-04 | 1.03E-03 |
| 20           | 1.61E-04             | 9.41E-05 | 2.11E-04 | 5.14E-04 | 9.72E-04 |
| Average      | 1.72E-04             | 9.79E-05 | 2.28E-04 | 5.09E-04 | 1.01E-03 |
| STDEV        | 7.51E-06             | 8.14E-06 | 1.26E-05 | 2.42E-05 | 3.04E-05 |

Table S4. He signal intensities and isotopic ratios from measurements on Helix SFT

| Analysis No.  | <sup>3</sup> He (fA) | STDEV  | <sup>4</sup> He (fA) | STDEV | <sup>3</sup> He/ <sup>4</sup> He | Error    |
|---------------|----------------------|--------|----------------------|-------|----------------------------------|----------|
| 1             | 0.166                | 0.0005 | 124331               | 4.5   | 1.33E-06                         | 4.09E-09 |
| 2             | 0.141                | 0.0015 | 103437               | 25.0  | 1.36E-06                         | 1.48E-08 |
| 3             | 0.156                | 0.0014 | 115963               | 21.4  | 1.34E-06                         | 1.19E-08 |
| 4             | 0.163                | 0.0008 | 118537               | 36.1  | 1.37E-06                         | 6.95E-09 |
| 5             | 0.156                | 0.0015 | 115089               | 5.2   | 1.36E-06                         | 1.28E-08 |
| 6             | 0.160                | 0.0009 | 116750               | 151.6 | 1.37E-06                         | 7.76E-09 |
| 7             | 0.152                | 0.0006 | 110281               | 53.5  | 1.38E-06                         | 5.22E-09 |
| 8             | 0.136                | 0.0008 | 99541                | 7.0   | 1.37E-06                         | 7.65E-09 |
| 9             | 0.133                | 0.0008 | 99473                | 173.7 | 1.34E-06                         | 8.29E-09 |
| 10            | 0.148                | 0.0005 | 110102               | 56.4  | 1.34E-06                         | 4.50E-09 |
| 11            | 0.166                | 0.0003 | 124126               | 154.7 | 1.33E-06                         | 3.26E-09 |
| 12            | 0.134                | 0.0015 | 99907                | 239.8 | 1.34E-06                         | 1.50E-08 |
| 13            | 0.156                | 0.0003 | 116968               | 154.7 | 1.33E-06                         | 3.46E-09 |
| 14            | 0.116                | 0.0015 | 86674                | 239.8 | 1.34E-06                         | 1.73E-08 |
| 15            | 0.143                | 0.0007 | 106574               | 13.6  | 1.34E-06                         | 6.19E-09 |
| 16            | 0.145                | 0.0005 | 110407               | 224.6 | 1.32E-06                         | 5.52E-09 |
| 17            | 0.129                | 0.0015 | 97751                | 15.1  | 1.32E-06                         | 1.49E-08 |
| 18            | 0.133                | 0.0019 | 100850               | 145.7 | 1.32E-06                         | 1.86E-08 |
| 19            | 0.124                | 0.0013 | 93630                | 191.4 | 1.33E-06                         | 1.46E-08 |
| 20            | 0.159                | 0.0011 | 117801               | 194.9 | 1.35E-06                         | 9.63E-09 |
| Average       |                      |        |                      |       | 1.34E-06                         |          |
| Stdev         |                      |        |                      |       | 1.8657E-08                       |          |
| Precision (%) |                      |        |                      |       | 1.39                             |          |

Table S5. Ne signal intensities and isotopic ratios from measurements on Helix SFT

| Analysis<br>No.  | <sup>20</sup> Ne<br>(fA) | STDEV  | <sup>21</sup> Ne<br>(fA) | STDEV | <sup>22</sup> Ne<br>(fA) | STDEV | <sup>20</sup> Ne/ <sup>22</sup> Ne | Error | <sup>21</sup> Ne/ <sup>22</sup> Ne | Error   |
|------------------|--------------------------|--------|--------------------------|-------|--------------------------|-------|------------------------------------|-------|------------------------------------|---------|
| 1                | 209526.6                 | 55.44  | 627.3                    | 0.18  | 21886.5                  | 7.97  | 9.57                               | 0.004 | 0.0287                             | 0.00001 |
| 2                | 215183.1                 | 14.00  | 643.4                    | 0.21  | 22428.3                  | 7.40  | 9.59                               | 0.003 | 0.0287                             | 0.00001 |
| 3                | 212617.7                 | 38.83  | 638.6                    | 0.12  | 22169.2                  | 4.49  | 9.59                               | 0.003 | 0.0288                             | 0.00001 |
| 4                | 222810.9                 | 483.13 | 677.8                    | 3.25  | 23274.4                  | 25.69 | 9.57                               | 0.023 | 0.0291                             | 0.00014 |
| 5                | 216215.2                 | 176.08 | 648.9                    | 1.01  | 22667.7                  | 0.94  | 9.54                               | 0.008 | 0.0286                             | 0.00004 |
| 6                | 214303.0                 | 14.50  | 643.3                    | 0.15  | 22420.5                  | 1.24  | 9.56                               | 0.001 | 0.0287                             | 0.00001 |
| 7                | 184370.3                 | 36.56  | 551.2                    | 0.35  | 19171.7                  | 3.17  | 9.62                               | 0.002 | 0.0288                             | 0.00002 |
| 8                | 167085.0                 | 627.74 | 501.8                    | 1.74  | 17497.3                  | 76.47 | 9.55                               | 0.055 | 0.0287                             | 0.00016 |
| 9                | 174578.1                 | 17.26  | 522.5                    | 0.33  | 18209.0                  | 2.20  | 9.59                               | 0.001 | 0.0287                             | 0.00002 |
| 10               | 203010.1                 | 16.24  | 607.3                    | 0.27  | 21151.5                  | 1.90  | 9.60                               | 0.001 | 0.0287                             | 0.00001 |
| 11               | 215454.6                 | 19.98  | 646.1                    | 0.08  | 22564.4                  | 1.53  | 9.55                               | 0.001 | 0.0286                             | 0.00000 |
| 12               | 205420.0                 | 24.21  | 616.3                    | 0.13  | 21558.0                  | 5.66  | 9.53                               | 0.003 | 0.0286                             | 0.00001 |
| 13               | 199378.4                 | 58.78  | 598.4                    | 0.14  | 20913.6                  | 9.93  | 9.53                               | 0.005 | 0.0286                             | 0.00002 |
| 14               | 169425.1                 | 28.70  | 507.8                    | 0.21  | 17733.5                  | 2.69  | 9.55                               | 0.002 | 0.0286                             | 0.00001 |
| 15               | 179105.5                 | 27.63  | 535.1                    | 0.14  | 18660.3                  | 2.23  | 9.60                               | 0.002 | 0.0287                             | 0.00001 |
| 16               | 174646.8                 | 23.81  | 523.1                    | 0.22  | 18244.5                  | 3.84  | 9.57                               | 0.002 | 0.0287                             | 0.00001 |
| 17               | 148587.4                 | 17.12  | 445.8                    | 0.17  | 15549.1                  | 1.67  | 9.56                               | 0.002 | 0.0287                             | 0.00001 |
| 18               | 144047.2                 | 30.75  | 431.0                    | 0.16  | 15031.5                  | 3.31  | 9.58                               | 0.003 | 0.0287                             | 0.00001 |
| 19               | 153220.1                 | 476.17 | 463.5                    | 1.13  | 15987.5                  | 54.77 | 9.58                               | 0.044 | 0.0290                             | 0.00012 |
| 20               | 175665.5                 | 178.92 | 526.0                    | 0.64  | 18317.6                  | 20.38 | 9.59                               | 0.014 | 0.0287                             | 0.00005 |
| Average          |                          |        |                          |       |                          |       | 9.5714                             |       | 0.0287                             |         |
| Stdev            |                          |        |                          |       |                          |       | 0.0244                             |       | 0.0001                             |         |
| Precision<br>(%) |                          |        |                          |       |                          |       | 0.26                               |       | 0.45                               |         |

Table S6. Ar signal intensities and isotopic ratios from measurements on Helix SFT

| Analysis No.  | <sup>36</sup> Ar (fA) | STDEV | <sup>38</sup> Ar (fA) | STDEV | <sup>40</sup> Ar (fA) | STDEV  | <sup>38</sup> Ar/ <sup>36</sup> Ar | Error  | <sup>40</sup> Ar/ <sup>36</sup> Ar | Error |
|---------------|-----------------------|-------|-----------------------|-------|-----------------------|--------|------------------------------------|--------|------------------------------------|-------|
| 1             | 102.1                 | 0.26  | 19.79                 | 0.20  | 30400.4               | 26.33  | 0.194                              | 0.0020 | 297.8                              | 0.81  |
| 2             | 101.3                 | 0.16  | 19.48                 | 0.19  | 30165.1               | 21.46  | 0.192                              | 0.0019 | 297.9                              | 0.51  |
| 3             | 102.6                 | 0.65  | 19.19                 | 0.27  | 30649.0               | 51.24  | 0.187                              | 0.0029 | 298.6                              | 1.97  |
| 4             | 93.5                  | 0.30  | 17.71                 | 0.24  | 27929.3               | 17.87  | 0.189                              | 0.0027 | 298.6                              | 0.99  |
| 5             | 754.6                 | 0.30  | 145.18                | 0.17  | 224206.7              | 10.48  | 0.192                              | 0.0002 | 297.1                              | 0.12  |
| 6             | 694.7                 | 0.27  | 132.90                | 0.20  | 206434.4              | 16.03  | 0.191                              | 0.0003 | 297.1                              | 0.12  |
| 7             | 719.8                 | 0.45  | 138.35                | 0.17  | 215175.6              | 13.34  | 0.192                              | 0.0003 | 298.9                              | 0.19  |
| 8             | 674.4                 | 0.26  | 128.51                | 0.10  | 201452.6              | 12.40  | 0.191                              | 0.0002 | 298.7                              | 0.11  |
| 9             | 660.8                 | 0.43  | 126.24                | 0.16  | 196974.7              | 16.28  | 0.191                              | 0.0003 | 298.1                              | 0.20  |
| 10            | 706.8                 | 1.70  | 133.77                | 0.40  | 210717.7              | 154.30 | 0.189                              | 0.0007 | 298.1                              | 0.75  |
| 11            | 751.4                 | 1.26  | 142.26                | 0.10  | 224653.6              | 71.78  | 0.189                              | 0.0003 | 299.0                              | 0.51  |
| 12            | 717.2                 | 1.66  | 136.16                | 0.46  | 214422.2              | 89.02  | 0.190                              | 0.0008 | 299.0                              | 0.70  |
| 13            | 722.2                 | 1.60  | 136.66                | 0.12  | 215098.7              | 69.88  | 0.189                              | 0.0005 | 297.8                              | 0.67  |
| 14            | 665.2                 | 1.65  | 125.67                | 0.24  | 198684.2              | 106.73 | 0.189                              | 0.0006 | 298.7                              | 0.76  |
| 15            | 670.3                 | 1.96  | 127.11                | 0.28  | 200382.3              | 50.76  | 0.190                              | 0.0007 | 298.9                              | 0.88  |
| 16            | 777.0                 | 1.45  | 147.94                | 0.42  | 232177.8              | 101.95 | 0.190                              | 0.0006 | 298.8                              | 0.57  |
| 17            | 686.5                 | 1.41  | 131.29                | 0.38  | 204970.0              | 75.59  | 0.191                              | 0.0007 | 298.6                              | 0.63  |
| 18            | 713.3                 | 1.52  | 135.72                | 0.43  | 212986.0              | 88.70  | 0.190                              | 0.0007 | 298.6                              | 0.65  |
| 19            | 688.8                 | 2.25  | 130.31                | 0.11  | 205420.9              | 116.30 | 0.189                              | 0.0006 | 298.2                              | 0.99  |
| 20            | 812.1                 | 2.25  | 153.64                | 0.11  | 242194.2              | 116.30 | 0.189                              | 0.0005 | 298.2                              | 0.84  |
| Average       |                       |       |                       |       |                       |        | 0.190                              |        | 298.34                             |       |
| Stdev         |                       |       |                       |       |                       |        | 0.002                              |        | 0.56                               |       |
| Precision (%) |                       |       |                       |       |                       |        | 0.83                               |        | 0.19                               |       |

Note: New chops for Ar was applied from 5<sup>th</sup> air standard measurement.



Table S7a. Kr signal intensities with standard deviations from measurements on Helix SFT

| Analysis No. | <sup>78</sup> Kr (fA) | STDEV | <sup>80</sup> Kr (fA) | STDEV | <sup>82</sup> Kr (fA) | STDEV | <sup>83</sup> Kr (fA) | STDEV | <sup>84</sup> Kr (fA) | STDEV  | <sup>86</sup> Kr (fA) | STDEV |
|--------------|-----------------------|-------|-----------------------|-------|-----------------------|-------|-----------------------|-------|-----------------------|--------|-----------------------|-------|
| 1            | 333.58                | 1.14  | 2152.88               | 11.50 | 10895.10              | 59.23 | 10776.08              | 36.71 | 53308.52              | 98.77  | 16241.51              | 49.12 |
| 2            | 339.45                | 1.01  | 2203.41               | 10.43 | 11194.49              | 53.58 | 11118.17              | 50.08 | 54895.67              | 205.25 | 16720.67              | 63.16 |
| 3            | 331.14                | 0.53  | 2142.53               | 0.45  | 10886.59              | 4.32  | 10793.41              | 14.80 | 53390.31              | 156.89 | 16261.62              | 37.99 |
| 4            | 309.87                | 0.47  | 2014.66               | 0.70  | 10237.91              | 1.90  | 10163.56              | 10.17 | 50239.64              | 101.20 | 15315.56              | 15.23 |
| 5            | 334.51                | 0.75  | 2163.30               | 0.62  | 11004.58              | 2.13  | 10914.46              | 13.90 | 54033.40              | 92.10  | 16452.09              | 35.14 |
| 6            | 322.86                | 1.28  | 2094.53               | 4.06  | 10649.75              | 23.29 | 10579.78              | 24.35 | 52336.48              | 126.26 | 15941.69              | 42.25 |
| 7            | 308.22                | 0.78  | 1996.58               | 3.70  | 10143.59              | 19.90 | 10044.23              | 32.46 | 49730.44              | 204.00 | 15144.83              | 66.73 |
| 8            | 318.23                | 0.21  | 2076.88               | 1.62  | 10568.75              | 11.26 | 10444.26              | 13.66 | 51496.55              | 110.01 | 15695.12              | 42.52 |
| 9            | 288.74                | 0.62  | 1872.88               | 0.42  | 9513.50               | 3.50  | 9438.63               | 18.00 | 46628.18              | 137.44 | 14185.23              | 42.36 |
| 10           | 344.70                | 0.35  | 2230.40               | 1.21  | 11345.06              | 2.81  | 11253.50              | 11.98 | 55774.92              | 116.31 | 16977.33              | 21.54 |
| 11           | 364.06                | 0.73  | 2351.79               | 1.77  | 11999.04              | 41.20 | 11859.77              | 8.66  | 58611.56              | 85.15  | 17836.67              | 29.27 |
| 12           | 327.93                | 1.23  | 2124.99               | 5.82  | 10830.32              | 27.91 | 10755.84              | 19.28 | 53240.10              | 31.13  | 16232.91              | 14.68 |
| 13           | 344.68                | 0.73  | 2225.99               | 2.01  | 11329.77              | 5.57  | 11232.02              | 15.09 | 55469.37              | 122.15 | 16893.75              | 30.18 |
| 14           | 268.06                | 0.39  | 1755.89               | 0.58  | 8930.94               | 1.69  | 8860.38               | 10.57 | 43712.84              | 106.74 | 13316.68              | 30.72 |
| 15           | 250.18                | 0.15  | 1621.03               | 0.93  | 8242.67               | 4.24  | 8170.00               | 8.49  | 40412.91              | 112.06 | 12306.54              | 30.58 |
| 16           | 279.82                | 1.24  | 1815.31               | 2.78  | 9225.33               | 14.14 | 9142.97               | 20.57 | 45208.51              | 142.62 | 13769.61              | 50.56 |
| 17           | 246.63                | 0.61  | 1597.97               | 2.01  | 8123.19               | 14.06 | 8053.20               | 17.75 | 39817.35              | 141.98 | 12131.55              | 34.60 |
| 18           | 279.29                | 0.50  | 1808.08               | 0.71  | 9186.95               | 7.98  | 9110.99               | 16.91 | 44988.57              | 130.41 | 13699.92              | 32.02 |
| 19           | 256.20                | 0.29  | 1659.79               | 2.68  | 8434.22               | 8.63  | 8352.84               | 11.35 | 41261.55              | 84.37  | 12591.79              | 29.06 |
| 20           | 320.31                | 0.34  | 2072.40               | 0.95  | 10532.19              | 2.98  | 10422.53              | 14.41 | 51488.90              | 87.73  | 15696.90              | 25.84 |

Table S7b. Kr isotope ratios from measurements on Helix SFT

| Analysis No.  | $^{78}\text{Kr}/^{84}\text{Kr}$ | Error    | $^{80}\text{Kr}/^{84}\text{Kr}$ | Error  | $^{82}\text{Kr}/^{84}\text{Kr}$ | Error   | $^{83}\text{Kr}/^{84}\text{Kr}$ | Error   | $^{86}\text{Kr}/^{84}\text{Kr}$ | Error  |
|---------------|---------------------------------|----------|---------------------------------|--------|---------------------------------|---------|---------------------------------|---------|---------------------------------|--------|
| 1             | 0.006258                        | 0.000024 | 0.0404                          | 0.0002 | 0.20438                         | 0.00117 | 0.20215                         | 0.00078 | 0.3047                          | 0.0011 |
| 2             | 0.006183                        | 0.000030 | 0.0401                          | 0.0002 | 0.20392                         | 0.00124 | 0.20253                         | 0.00119 | 0.3046                          | 0.0016 |
| 3             | 0.006202                        | 0.000021 | 0.0401                          | 0.0001 | 0.20391                         | 0.00060 | 0.20216                         | 0.00066 | 0.3046                          | 0.0011 |
| 4             | 0.006168                        | 0.000016 | 0.0401                          | 0.0001 | 0.20378                         | 0.00041 | 0.20230                         | 0.00046 | 0.3049                          | 0.0007 |
| 5             | 0.006191                        | 0.000017 | 0.0400                          | 0.0001 | 0.20366                         | 0.00035 | 0.20199                         | 0.00043 | 0.3045                          | 0.0008 |
| 6             | 0.006169                        | 0.000029 | 0.0400                          | 0.0001 | 0.20349                         | 0.00066 | 0.20215                         | 0.00067 | 0.3046                          | 0.0011 |
| 7             | 0.006198                        | 0.000030 | 0.0401                          | 0.0002 | 0.20397                         | 0.00093 | 0.20197                         | 0.00105 | 0.3045                          | 0.0018 |
| 8             | 0.006180                        | 0.000014 | 0.0403                          | 0.0001 | 0.20523                         | 0.00049 | 0.20281                         | 0.00051 | 0.3048                          | 0.0011 |
| 9             | 0.006192                        | 0.000023 | 0.0402                          | 0.0001 | 0.20403                         | 0.00061 | 0.20242                         | 0.00071 | 0.3042                          | 0.0013 |
| 10            | 0.006180                        | 0.000014 | 0.0400                          | 0.0001 | 0.20341                         | 0.00043 | 0.20177                         | 0.00047 | 0.3044                          | 0.0007 |
| 11            | 0.006211                        | 0.000015 | 0.0401                          | 0.0001 | 0.20472                         | 0.00076 | 0.20235                         | 0.00033 | 0.3043                          | 0.0007 |
| 12            | 0.006160                        | 0.000023 | 0.0399                          | 0.0001 | 0.20342                         | 0.00054 | 0.20203                         | 0.00038 | 0.3049                          | 0.0003 |
| 13            | 0.006214                        | 0.000019 | 0.0401                          | 0.0001 | 0.20425                         | 0.00046 | 0.20249                         | 0.00052 | 0.3046                          | 0.0009 |
| 14            | 0.006132                        | 0.000017 | 0.0402                          | 0.0001 | 0.20431                         | 0.00050 | 0.20270                         | 0.00055 | 0.3046                          | 0.0010 |
| 15            | 0.006191                        | 0.000018 | 0.0401                          | 0.0001 | 0.20396                         | 0.00058 | 0.20216                         | 0.00060 | 0.3045                          | 0.0011 |
| 16            | 0.006189                        | 0.000034 | 0.0402                          | 0.0001 | 0.20406                         | 0.00072 | 0.20224                         | 0.00078 | 0.3046                          | 0.0015 |
| 17            | 0.006194                        | 0.000027 | 0.0401                          | 0.0002 | 0.20401                         | 0.00081 | 0.20225                         | 0.00085 | 0.3047                          | 0.0014 |
| 18            | 0.006208                        | 0.000021 | 0.0402                          | 0.0001 | 0.20421                         | 0.00062 | 0.20252                         | 0.00070 | 0.3045                          | 0.0011 |
| 19            | 0.006209                        | 0.000014 | 0.0402                          | 0.0001 | 0.20441                         | 0.00047 | 0.20244                         | 0.00050 | 0.3052                          | 0.0009 |
| 20            | 0.006221                        | 0.000012 | 0.0402                          | 0.0001 | 0.20455                         | 0.00035 | 0.20242                         | 0.00044 | 0.3049                          | 0.0007 |
| Average       | 0.006193                        |          | 0.0401                          |        | 0.20408                         |         | 0.20229                         |         | 0.3046                          |        |
| Stdev         | 0.000026                        |          | 0.0001                          |        | 0.00045                         |         | 0.00026                         |         | 0.0002                          |        |
| Precision (%) | 0.42                            |          | 0.27                            |        | 0.22                            |         | 0.13                            |         | 0.07                            |        |

Table S8a. Xe signal intensities and standard deviations from measurements on Helix SFT

| Analysis No. | $^{128}\text{Xe}$ (fA) | STDEV | $^{129}\text{Xe}$ (fA) | STDEV | $^{130}\text{Xe}$ (fA) | STDEV | $^{131}\text{Xe}$ (fA) | STDEV | $^{132}\text{Xe}$ (fA) | STDEV | $^{134}\text{Xe}$ (fA) | STDEV | $^{136}\text{Xe}$ (fA) | STDEV |
|--------------|------------------------|-------|------------------------|-------|------------------------|-------|------------------------|-------|------------------------|-------|------------------------|-------|------------------------|-------|
| 1            | 308.00                 | 1.38  | 4155.81                | 11.91 | 630.85                 | 1.34  | 3250.45                | 7.37  | 4115.56                | 12.61 | 1610.96                | 4.11  | 1367.14                | 2.20  |
| 2            | 303.11                 | 1.38  | 4108.07                | 12.13 | 623.63                 | 1.24  | 3217.81                | 5.57  | 4069.95                | 10.20 | 1592.77                | 3.43  | 1352.06                | 1.87  |
| 3            | 299.67                 | 1.15  | 4045.40                | 10.11 | 614.59                 | 1.01  | 3171.45                | 4.73  | 4009.62                | 10.12 | 1569.47                | 3.33  | 1333.74                | 1.60  |
| 4            | 297.78                 | 1.50  | 4037.41                | 11.69 | 614.37                 | 1.12  | 3172.26                | 5.45  | 4011.63                | 9.83  | 1570.45                | 3.60  | 1334.06                | 1.80  |
| 5            | 282.06                 | 1.50  | 3831.89                | 11.24 | 582.48                 | 1.31  | 3003.36                | 6.14  | 3797.00                | 11.88 | 1486.14                | 3.72  | 1262.00                | 1.95  |
| 6            | 276.76                 | 1.61  | 3737.09                | 17.53 | 568.41                 | 2.48  | 2932.19                | 12.21 | 3713.23                | 16.07 | 1452.07                | 5.21  | 1232.03                | 4.17  |
| 7            | 270.02                 | 1.31  | 3659.53                | 12.11 | 555.32                 | 1.20  | 2869.77                | 6.11  | 3629.66                | 11.96 | 1421.89                | 3.87  | 1206.90                | 1.48  |
| 8            | 290.65                 | 0.44  | 3955.49                | 6.25  | 605.79                 | 1.08  | 3135.87                | 6.95  | 3973.11                | 8.47  | 1540.53                | 3.54  | 1311.31                | 3.27  |
| 9            | 298.63                 | 0.77  | 4055.79                | 6.89  | 620.12                 | 0.57  | 3205.21                | 2.78  | 4070.59                | 7.29  | 1585.96                | 2.65  | 1348.61                | 1.47  |
| 10           | 291.29                 | 0.74  | 3943.86                | 6.68  | 600.41                 | 0.54  | 3105.30                | 2.81  | 3932.02                | 6.39  | 1538.74                | 2.81  | 1307.65                | 1.07  |
| 11           | 297.53                 | 0.90  | 4039.88                | 9.74  | 617.04                 | 1.24  | 3194.64                | 6.24  | 4052.27                | 7.98  | 1579.52                | 2.82  | 1343.42                | 1.20  |
| 12           | 269.91                 | 1.43  | 3744.93                | 9.13  | 573.05                 | 1.50  | 2970.93                | 6.49  | 3763.75                | 11.90 | 1466.71                | 3.80  | 1248.04                | 1.66  |
| 13           | 314.14                 | 1.56  | 4264.84                | 24.11 | 650.59                 | 3.35  | 3354.86                | 19.77 | 4275.55                | 23.25 | 1669.39                | 9.05  | 1415.49                | 6.52  |
| 14           | 250.17                 | 1.43  | 3471.11                | 9.13  | 531.15                 | 1.50  | 2753.70                | 6.49  | 3488.55                | 11.90 | 1359.47                | 3.80  | 1156.79                | 1.66  |
| 15           | 220.34                 | 1.56  | 2991.32                | 24.11 | 456.32                 | 3.35  | 2353.07                | 19.77 | 2998.83                | 23.25 | 1170.89                | 9.05  | 992.81                 | 6.52  |
| 16           | 243.23                 | 1.25  | 3313.03                | 10.34 | 506.61                 | 1.16  | 2620.82                | 5.97  | 3317.23                | 9.43  | 1294.34                | 2.90  | 1101.81                | 1.61  |
| 17           | 178.25                 | 1.17  | 2420.66                | 11.34 | 369.66                 | 1.12  | 1915.97                | 6.75  | 2426.04                | 10.15 | 947.08                 | 3.52  | 805.67                 | 1.69  |
| 18           | 229.16                 | 1.13  | 3116.18                | 10.83 | 476.28                 | 1.14  | 2462.47                | 5.34  | 3120.85                | 8.34  | 1218.52                | 2.52  | 1036.02                | 1.25  |
| 19           | 207.46                 | 0.87  | 2810.23                | 6.38  | 429.33                 | 0.94  | 2213.22                | 5.18  | 2812.88                | 7.20  | 1097.07                | 2.42  | 931.07                 | 1.48  |
| 20           | 252.23                 | 0.71  | 3426.59                | 7.00  | 522.25                 | 0.43  | 2702.21                | 3.70  | 3428.27                | 7.90  | 1337.61                | 2.91  | 1138.63                | 0.98  |

Table S8b. Xe isotope ratios from measurements on Helix SFT

| Analysis No.  | $^{128}\text{Xe}/^{130}\text{Xe}$ | Error  | $^{129}\text{Xe}/^{130}\text{Xe}$ | Error | $^{131}\text{Xe}/^{130}\text{Xe}$ | Error | $^{132}\text{Xe}/^{130}\text{Xe}$ | Error | $^{134}\text{Xe}/^{130}\text{Xe}$ | Error | $^{136}\text{Xe}/^{130}\text{Xe}$ | Error |
|---------------|-----------------------------------|--------|-----------------------------------|-------|-----------------------------------|-------|-----------------------------------|-------|-----------------------------------|-------|-----------------------------------|-------|
| 1             | 0.488                             | 0.0024 | 6.59                              | 0.02  | 5.15                              | 0.02  | 6.52                              | 0.02  | 2.55                              | 0.01  | 2.167                             | 0.006 |
| 2             | 0.486                             | 0.0024 | 6.59                              | 0.02  | 5.16                              | 0.01  | 6.53                              | 0.02  | 2.55                              | 0.01  | 2.168                             | 0.005 |
| 3             | 0.488                             | 0.0020 | 6.58                              | 0.02  | 5.16                              | 0.01  | 6.52                              | 0.02  | 2.55                              | 0.01  | 2.170                             | 0.004 |
| 4             | 0.485                             | 0.0026 | 6.57                              | 0.02  | 5.16                              | 0.01  | 6.53                              | 0.02  | 2.56                              | 0.01  | 2.171                             | 0.005 |
| 5             | 0.484                             | 0.0028 | 6.58                              | 0.02  | 5.16                              | 0.02  | 6.52                              | 0.03  | 2.55                              | 0.01  | 2.167                             | 0.006 |
| 6             | 0.487                             | 0.0035 | 6.57                              | 0.04  | 5.16                              | 0.03  | 6.53                              | 0.04  | 2.55                              | 0.01  | 2.168                             | 0.012 |
| 7             | 0.486                             | 0.0026 | 6.59                              | 0.03  | 5.17                              | 0.02  | 6.54                              | 0.03  | 2.56                              | 0.01  | 2.173                             | 0.005 |
| 8             | 0.480                             | 0.0011 | 6.53                              | 0.02  | 5.18                              | 0.01  | 6.56                              | 0.02  | 2.54                              | 0.01  | 2.165                             | 0.007 |
| 9             | 0.482                             | 0.0013 | 6.54                              | 0.01  | 5.17                              | 0.01  | 6.56                              | 0.01  | 2.56                              | 0.00  | 2.175                             | 0.003 |
| 10            | 0.485                             | 0.0013 | 6.57                              | 0.01  | 5.17                              | 0.01  | 6.55                              | 0.01  | 2.56                              | 0.01  | 2.178                             | 0.003 |
| 11            | 0.482                             | 0.0017 | 6.55                              | 0.02  | 5.18                              | 0.01  | 6.57                              | 0.02  | 2.56                              | 0.01  | 2.177                             | 0.005 |
| 12            | 0.471                             | 0.0028 | 6.54                              | 0.02  | 5.18                              | 0.02  | 6.57                              | 0.03  | 2.56                              | 0.01  | 2.178                             | 0.006 |
| 13            | 0.483                             | 0.0035 | 6.56                              | 0.05  | 5.16                              | 0.04  | 6.57                              | 0.05  | 2.57                              | 0.02  | 2.176                             | 0.015 |
| 14            | 0.471                             | 0.0030 | 6.54                              | 0.03  | 5.18                              | 0.02  | 6.57                              | 0.03  | 2.56                              | 0.01  | 2.178                             | 0.007 |
| 15            | 0.483                             | 0.0049 | 6.56                              | 0.07  | 5.16                              | 0.06  | 6.57                              | 0.07  | 2.57                              | 0.03  | 2.176                             | 0.021 |
| 16            | 0.480                             | 0.0027 | 6.54                              | 0.03  | 5.17                              | 0.02  | 6.55                              | 0.02  | 2.55                              | 0.01  | 2.175                             | 0.006 |
| 17            | 0.482                             | 0.0035 | 6.55                              | 0.04  | 5.18                              | 0.02  | 6.56                              | 0.03  | 2.56                              | 0.01  | 2.179                             | 0.008 |
| 18            | 0.481                             | 0.0026 | 6.54                              | 0.03  | 5.17                              | 0.02  | 6.55                              | 0.02  | 2.56                              | 0.01  | 2.175                             | 0.006 |
| 19            | 0.483                             | 0.0023 | 6.55                              | 0.02  | 5.16                              | 0.02  | 6.55                              | 0.02  | 2.56                              | 0.01  | 2.169                             | 0.006 |
| 20            | 0.483                             | 0.0014 | 6.56                              | 0.01  | 5.17                              | 0.01  | 6.56                              | 0.02  | 2.56                              | 0.01  | 2.180                             | 0.003 |
| Ave           | 0.483                             |        | 6.56                              |       | 5.17                              |       | 6.55                              |       | 2.56                              |       | 2.173                             |       |
| Stdev         | 0.005                             |        | 0.02                              |       | 0.01                              |       | 0.02                              |       | 0.01                              |       | 0.005                             |       |
| Precision (%) | 0.95                              |        | 0.30                              |       | 0.20                              |       | 0.28                              |       | 0.21                              |       | 0.22                              |       |
